# Supplementary material
Source: publisher figshare collection journal article supplement (https://acs.figshare.com/ndownloader/files/22111092)
Supplement: Supplementary file 1 [file 22111092]

# **In-Situ Spectroscopic Ellipsometry for Thermochromic CsPbI<sub>3</sub> Phase Evolution Portfolio**

Meng Yuan<sup>†</sup>, Long Yuan<sup>†\*</sup>, Zhiyan Hu<sup>†</sup>, Zhaoliang Yu<sup>†</sup>, Haibo Li<sup>†\*</sup>, Eva M. Barea<sup>‡</sup>, Juan Bisquert<sup>‡</sup>, Xiangdong Meng<sup>† § \*</sup>

<sup>†</sup>Key Laboratory of Functional Materials Physics and Chemistry of the Ministry of Education, Jilin Normal University, Changchun, P. R. China. X.M. email: mengxiangdong@jlnu.edu.cn; L.Y. email: yuanlong@jlnu.edu.cn; H.L. lihaibo@jlnu.edu.cn

<sup>‡</sup>Institute of Advanced Materials (INAM), Universitat Jaume I, 12006 Castelló, Spain.

<sup>§</sup> Key Laboratory of Preparation and Application of Environmental Friendly Materials, Ministry of Education, Jilin Normal University, Changchun 130103, P. R. China.

## Contents

|                                                                                                                                                                                                                                                                                                                                                                                                                                                                                                                                                        |     |
|--------------------------------------------------------------------------------------------------------------------------------------------------------------------------------------------------------------------------------------------------------------------------------------------------------------------------------------------------------------------------------------------------------------------------------------------------------------------------------------------------------------------------------------------------------|-----|
| Appendix .....                                                                                                                                                                                                                                                                                                                                                                                                                                                                                                                                         | S1  |
| Tables:                                                                                                                                                                                                                                                                                                                                                                                                                                                                                                                                                |     |
| Table S1 Roughness and average value of the above six $\delta$ -CsPbI <sub>3</sub> samples. ....                                                                                                                                                                                                                                                                                                                                                                                                                                                       | S5  |
| Figures:                                                                                                                                                                                                                                                                                                                                                                                                                                                                                                                                               |     |
| Figure S1 (a) SEM image of the $\delta$ -CsPbI <sub>3</sub> after once or twice (b) conversion between high and low temperature phase. (c) EDS of the $\delta$ -CsPbI <sub>3</sub> and the inset table is the percentage of element content in five different points. ....                                                                                                                                                                                                                                                                             | S4  |
| Figure S2 Atomic force micrographs of the $\delta$ -CsPbI <sub>3</sub> thin films. ....                                                                                                                                                                                                                                                                                                                                                                                                                                                                | S5  |
| Figure S3 The $\alpha$ -CsPbI <sub>3</sub> thin films photography of in situ confocal low frequency Raman spectra at (a) 53 cm <sup>-1</sup> and (b) 106 cm <sup>-1</sup> . (c) is spectrums of in situ confocal Raman, and the characteristic peak position is marked by arrow. (d) is a microscopic photograph of the test point. ....                                                                                                                                                                                                               | S6  |
| Figure S4 The in situ confocal Raman spectra of the $\delta$ -CsPbI <sub>3</sub> thin films at each point (resolution: 0.1*0.1 $\mu$ m <sup>2</sup> ). ....                                                                                                                                                                                                                                                                                                                                                                                            | S7  |
| Figure S5 Comparison of the XRD difference of $\beta$ - and $\gamma$ -CsPbI <sub>3</sub> film. ....                                                                                                                                                                                                                                                                                                                                                                                                                                                    | S8  |
| Figure S6 (a) Temperature dependent XRD of CsPbI <sub>3</sub> film measured in vacuum and enlarged view of the diffraction results in the 2-theta range of 9-11 °C. ....                                                                                                                                                                                                                                                                                                                                                                               | S9  |
| Figure S7 Schematics of the optical model of (a) the FTO substrate and (b) the CsPbI <sub>3</sub> thin films. ....                                                                                                                                                                                                                                                                                                                                                                                                                                     | S10 |
| Figure S8 Measurement and analysis for the FTO substrate: (a) Ellipsometric experimental spectra (point lines) and simulate spectra (dotted lines) of the FTO substrate at a 70 ° angle of incidence. (b) Photo energy-dependent optical constants of the FTO layer. ....                                                                                                                                                                                                                                                                              | S11 |
| Figure S9 XRD patterns of the $\delta$ -CsPbI <sub>3</sub> thin film on silicon substrate. Inset shows a HRTEM image of $\delta$ -CsPbI <sub>3</sub> with a lattice fringe of 2.5 Å. ....                                                                                                                                                                                                                                                                                                                                                              | S12 |
| Figure S10 Measurement and analysis for the Si substrate: (a) Ellipsometric experimental spectra (point lines) and simulate spectra (dotted lines) of the Si substrate at a 70 ° angle of incidence. (b) Photon energy-dependent optical constants of the SiO <sub>2</sub> layer. (c) Schematic of the optical model. Results of the fitting parameters are marked in red in the model. ....                                                                                                                                                           | S13 |
| Figure S11 Measurement and analysis for the $\alpha$ -CsPbI <sub>3</sub> and the $\delta$ -CsPbI <sub>3</sub> thin film on the Si substrate: (a) and (c) Ellipsometric experimental spectra (point lines) and simulate spectra (dotted lines) of the $\alpha$ -CsPbI <sub>3</sub> and the $\delta$ -CsPbI <sub>3</sub> thin film at a 70 ° angle of incidence. (b) and (d) Photo Energy-dependent optical constants of the $\alpha$ -CsPbI <sub>3</sub> and the $\delta$ -CsPbI <sub>3</sub> thin film layer. (e) Schematic of the optical model. .... | S14 |
| Figure S12 In-situ dynamic ellipsometry spectra of FTO substrate in (a) heating and (b) cooling processes from 100 to 360 °C. ....                                                                                                                                                                                                                                                                                                                                                                                                                     | S15 |

|                                                                                                                                                                                                                             |     |
|-----------------------------------------------------------------------------------------------------------------------------------------------------------------------------------------------------------------------------|-----|
| Figure S13 In-situ dynamic ellipsometry spectra of as-prepared CsPbI <sub>3</sub> film in (a) heating and (b) cooling processes from 100 to 360 °C. ....                                                                    | S16 |
| Figure S14 Second derivatives of the pseudodielectric function numerically calculated spectra for four phases of CsPbI <sub>3</sub> thin films: (a) $\delta$ (b) $\alpha$ , (c) $\beta$ and (d) $\gamma$ , respectively. .. | S17 |

## Appendix

### Tauc-Lorentz model

This model is from Jellison and Modine, APL 69,371-373 (1996). In this original paper, there is an error of calculation of the real part of the dielectric function.

In the Tauc-Lorentz model, the  $\epsilon_2$  is expressed as a product of the Tauc gap and the Lorentz model:

$$\epsilon = \epsilon_1 + i\epsilon_2$$

$$i\epsilon_2 = \begin{cases} \frac{1}{E} \cdot \frac{A \cdot E_0 \cdot C \cdot (E - E_g)^2}{2a} & (E > E_g) \\ 0 & (E \leq E_g) \end{cases}$$

$$\epsilon_1 = \frac{\pi}{2} \cdot P \cdot \int_{E_g}^{\infty} \frac{\xi \cdot \epsilon_2(\xi)}{\xi^2 - E^2}$$

where A is the amplitude parameter, C is the broadening parameter, and  $E_0$  represents the peak transition energy. The corresponding  $\epsilon_1$  is obtained from  $\epsilon_2$  by the Kramers–Kronig relations.

Solving the integral:

$$\epsilon_1 = \frac{A \cdot C \cdot a_{\ln}}{2 \cdot \pi \cdot \xi^4 \cdot \alpha \cdot E_0} \cdot \ln \left[ \frac{E_0^2 + E_g^2 + \alpha \cdot E_g}{E_0^2 + E_g^2 - \alpha \cdot E_g} \right] - \frac{A \cdot a_{a \cdot \tan}}{\pi \cdot \xi^4 \cdot E_0}$$

$$\cdot \left[ \pi - a \cdot \tan \left( \frac{2 \cdot E_g + \alpha}{C} \right) + a \cdot \tan \left( \frac{\alpha - 2 \cdot E_g}{C} \right) \right] + \frac{2 \cdot A \cdot E_0}{\pi \cdot \xi^4 \cdot \alpha} \left\{ E_g \cdot (E^2 - \gamma^2) \cdot \left[ \pi + 2 \cdot a \right. \right.$$

$$\cdot \left. \tan \left( \frac{\gamma^2 - E_g^2}{\alpha \cdot C} \right) \right] \right\} - \frac{A \cdot E_0 \cdot C \cdot (E^2 + E_g^2)}{\pi \cdot \xi^4 \cdot E}$$

$$\cdot \ln \left( \frac{|E - E_g|}{E + E_g} \right) + \frac{2 \cdot A \cdot E_0 \cdot C \cdot E_g}{\pi \cdot \xi^4} \cdot \ln \left[ \frac{|E - E_g| \cdot (E + E_g)}{\sqrt{(E_0^2 - E_g^2)^2 + E_g^2 \cdot C^2}} \right]$$

where:

$$a_{\ln} = (E_g^2 - E_0^2)E^2 + E_g^2C^2 - E_0^2(E_0^2 + 3E_g^2)$$

$$a_{a \cdot \tan} = (E^2 - E_0^2)(E_0^2 + E_g^2) + E_g^2C^2$$

$$\xi^4 = (E^2 - \gamma^2)^2 + \frac{\alpha^2 \cdot C^2}{4}$$

$$\alpha = \sqrt{4 \cdot E_0^2 - C^2}$$

$$\gamma = \sqrt{4 \cdot E_0^2 - \frac{C^2}{2}}$$

In the actual calculation, the values of  $|E - E_g|$  were chosen to not become zero. Therefore, the Tau-Lorentz model is determined by five parameters [ $\varepsilon_1$ , A, C,  $E_g$  and  $E_0$ .]

$$E(eV) = hv = \frac{1240}{\lambda(nm)}$$

$$\alpha(\lambda) = \frac{4\pi k(\lambda)}{\lambda}$$

The relationship between complex optical constant and complex dielectric constant:

$$\tilde{N} = n - ik$$

$$\varepsilon = \varepsilon_1 - i\varepsilon_2$$

$$\varepsilon = \tilde{N}^2$$

$$n^2 - k^2 = \varepsilon_1$$

$$2nk = \varepsilon_2$$

Theoretical spectrum is adjusted to experimental one. Goodness of fit is given by value  $\chi^2$ . It should be as small as possible:

$$\chi^2 = \min \sum_{i=1}^n \left[ \frac{(\Psi_{th} - \Psi_{exp})_i^2}{\Gamma_{\Psi,i}} + \frac{(\Delta_{th} - \Delta_{exp})_i^2}{\Gamma_{\Delta,i}} \right]$$

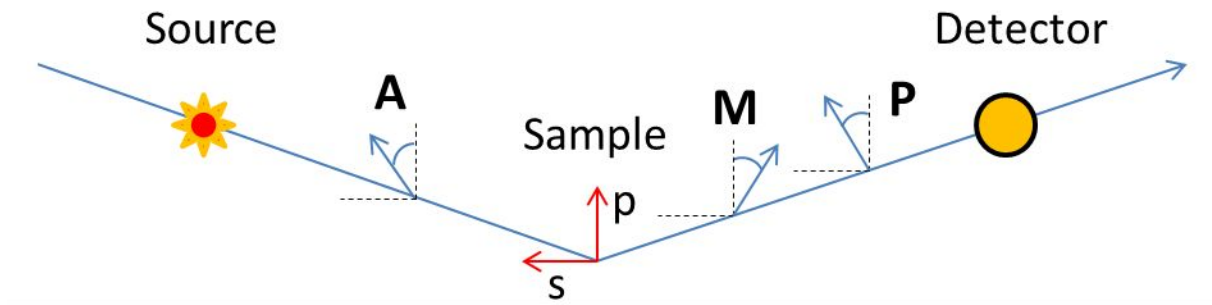

Detected electric field is deduced through Jones matrix product and incident electric field Jones vector:

$$\vec{E}_d = [AR_A SR_M MR_P - MP] \vec{E}_i$$

Only intensity is measurable, proportional to square of field.

$$I = \left| \overrightarrow{E_d} \right|^2 = I_O + I_S \sin \delta(t) + I_C \cos \delta(t)$$

In the general case for P, M, and A:

$$I_O = 1 - \cos 2\Psi \cos A + \cos 2(P - M) \cos 2M (\cos 2A - \cos 2\Psi) + \cos 2(P - M) \sin 2A \sin 2M \sin 2\Psi \cos \Delta$$

$$I_S = \sin 2(P - M) \sin 2A \sin 2\Psi \sin \Delta$$

$$I_C = \sin 2(P - M) [\sin 2M (\cos 2\Psi - \cos 2A) + \sin 2A \cos 2M \sin 2\Psi \cos \Delta]$$

By construction  $P - M = 45^\circ$ , then  $I_S$   $I_C$  relation to  $\Psi$  and  $\Delta$  becomes simple:

$$M = 0^\circ \pm 90^\circ \text{ and } A = \pm 45^\circ, \text{ then}$$

$$I_S = \pm_A \sin 2\Psi \sin \Delta \text{ and } I_C = \pm_M \pm_A \sin 2\Psi \cos \Delta$$

In this work, we use that Configuration II :  $P - M = 45^\circ[90^\circ]$ ;  $M=0^\circ[90^\circ]$ ;  $A=45^\circ[90^\circ]$

$$I_S = \sin 2\Psi \sin \Delta \text{ and } I_C = \cos 2\Psi$$

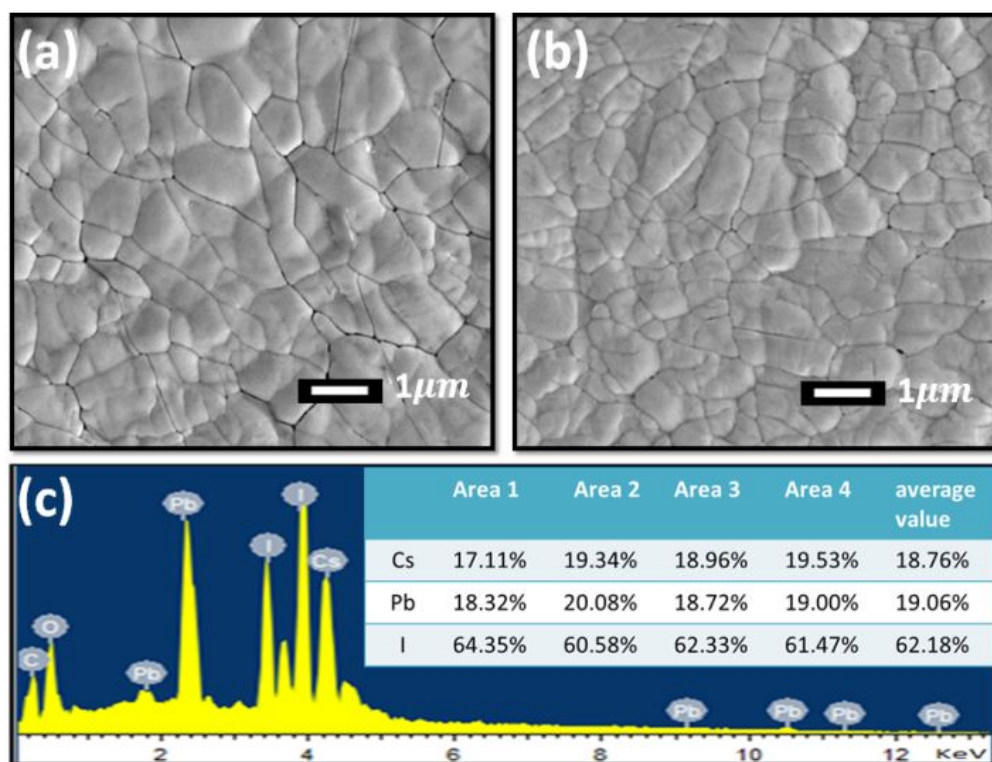

Figure S1 (a) SEM image of the  $\delta$ -CsPbI<sub>3</sub> after once or twice (b) conversion between high and low temperature phase. (c) EDS of the  $\delta$ -CsPbI<sub>3</sub> and the inset table is the percentage of element content in five different points.

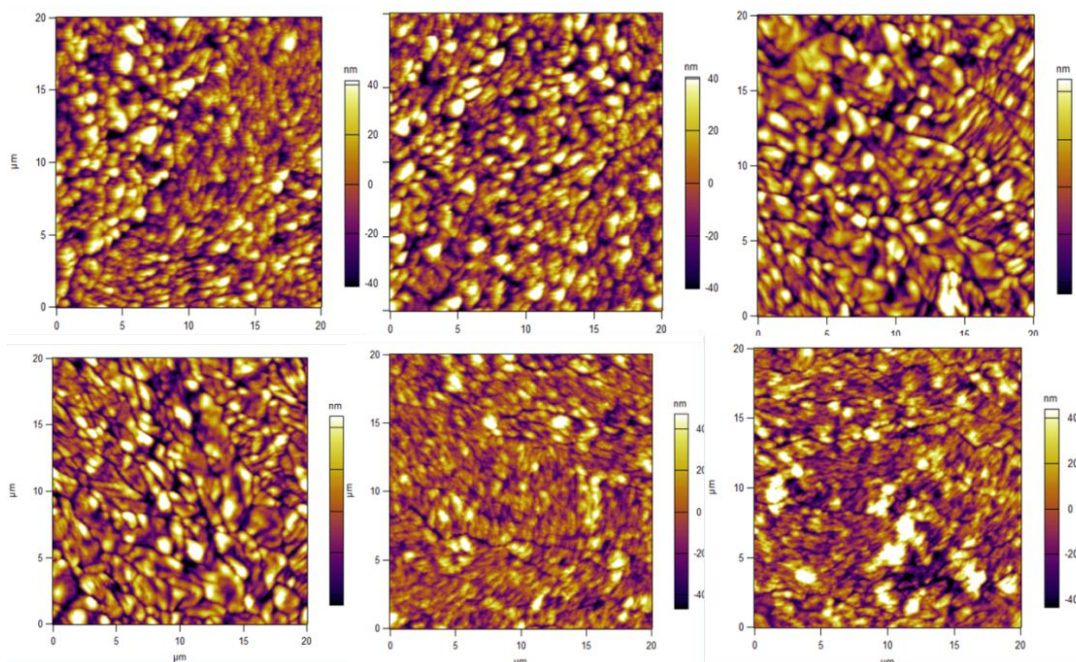

Figure S2 Atomic force micrographs of the  $\delta$ -CsPbI<sub>3</sub> thin films.

Table S1 Roughness and average value of the above six  $\delta$ -CsPbI<sub>3</sub> samples.

|               | RMS<br>(nm) | Max<br>(nm) | Min<br>(nm) |
|---------------|-------------|-------------|-------------|
| Area1         | 19.085      | 85.149      | -73.508     |
| Area2         | 20.434      | 81.849      | -70.881     |
| Area3         | 22.965      | 123.020     | -76.865     |
| Area4         | 22.770      | 102.695     | -83.505     |
| Area5         | 17.238      | 88.743      | -63.286     |
| Area6         | 21.218      | 114.505     | -72.673     |
| average value | 20.618      | 99.327      | -73.453     |



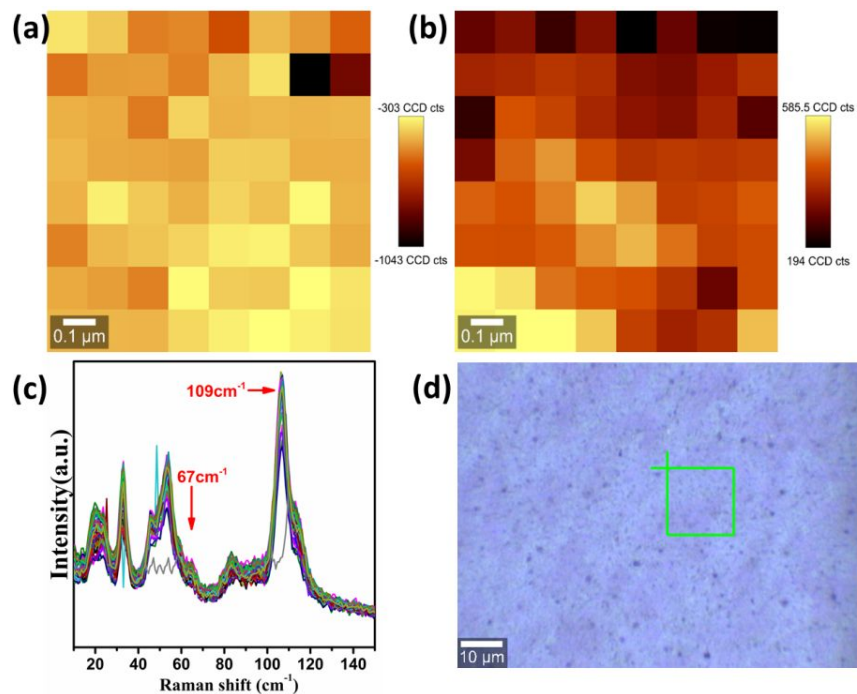

Figure S3 The  $\alpha$ -CsPbI<sub>3</sub> thin films photography of in situ confocal low frequency Raman spectra at (a) 53  $\text{cm}^{-1}$  and (b) 106  $\text{cm}^{-1}$ . (c) is spectrums of in situ confocal Raman, and the characteristic peak position is marked by arrow. (d) is a microscopic photograph of the test point.

Intensity(a.u.)

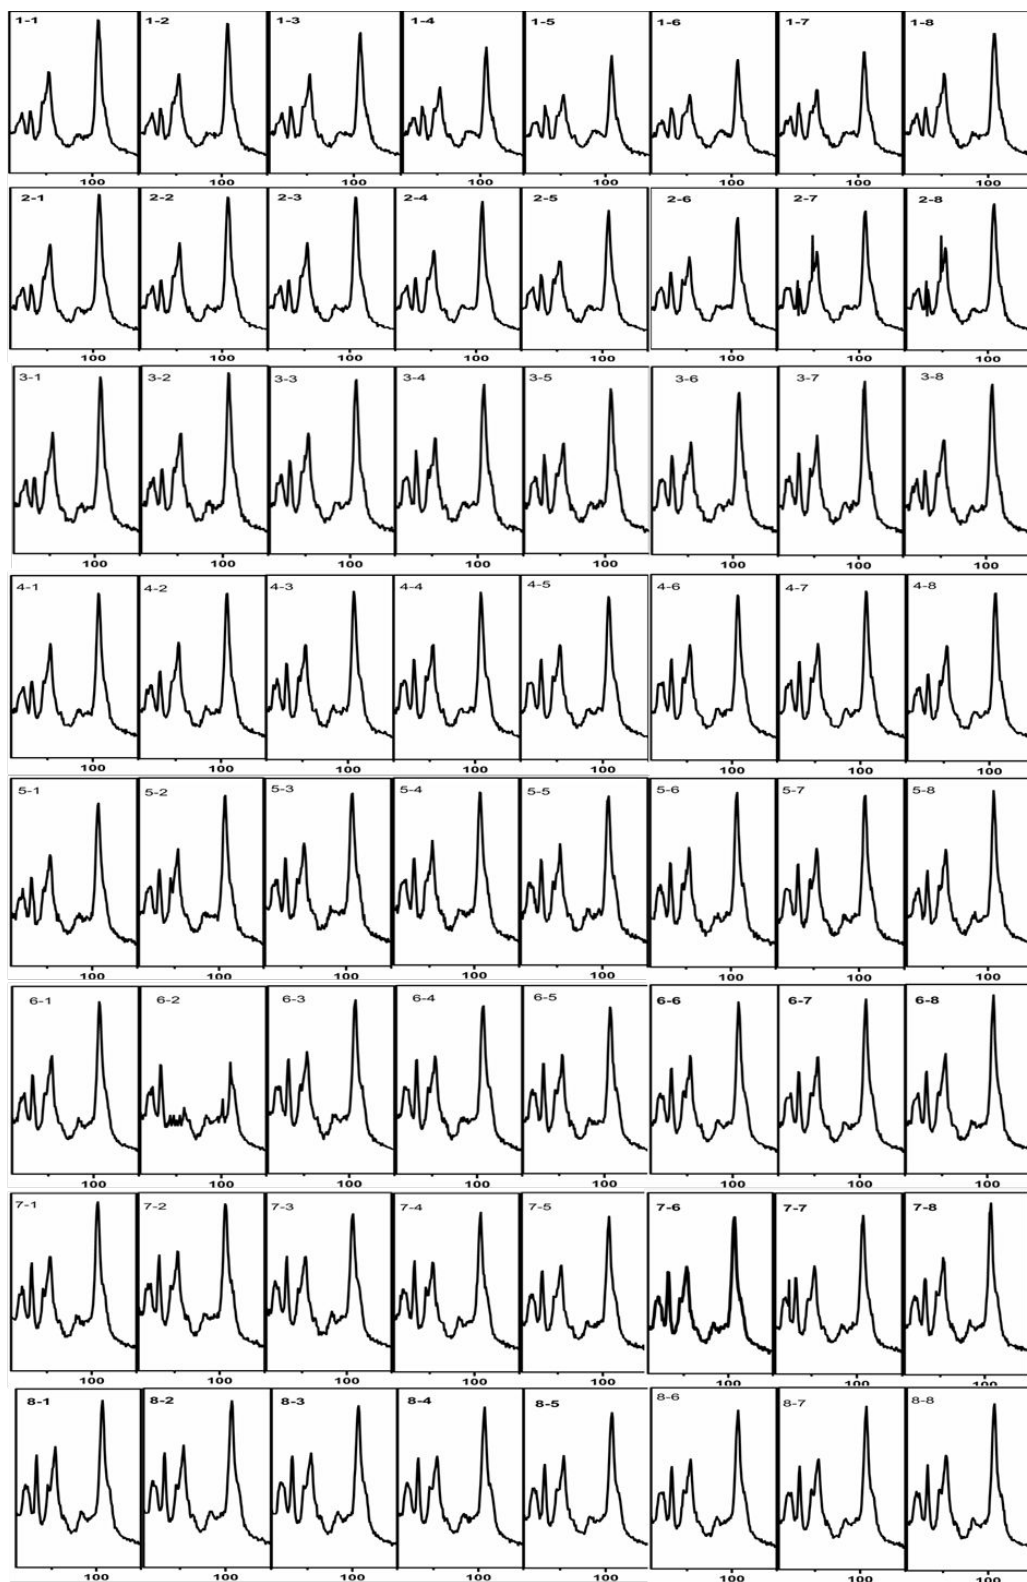

Raman shift (cm<sup>-1</sup>)

Figure S4 The in situ confocal Raman spectra of the  $\delta$ -CsPbI<sub>3</sub> thin films at each point (resolution: 0.1\*0.1  $\mu\text{m}^2$ ).

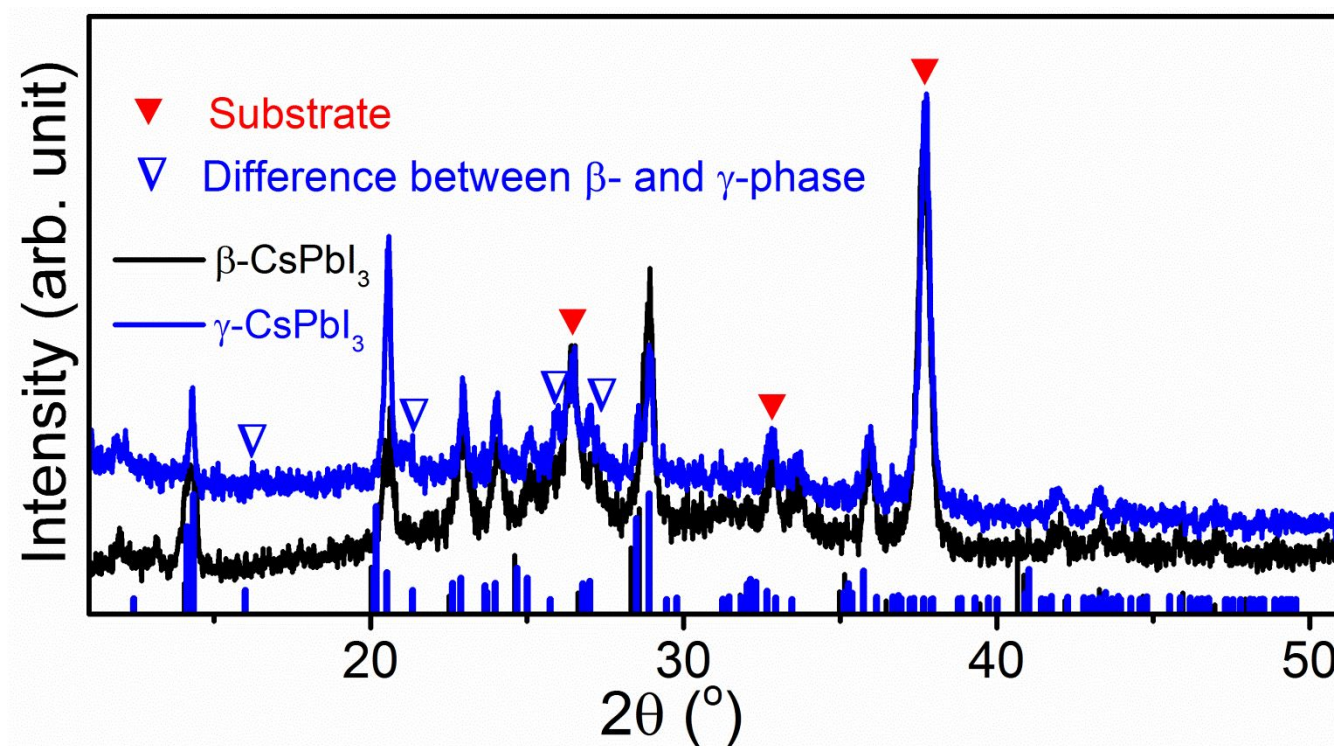

Figure S5 Comparison of the XRD difference of  $\beta$ - and  $\gamma$ -CsPbI<sub>3</sub> film.

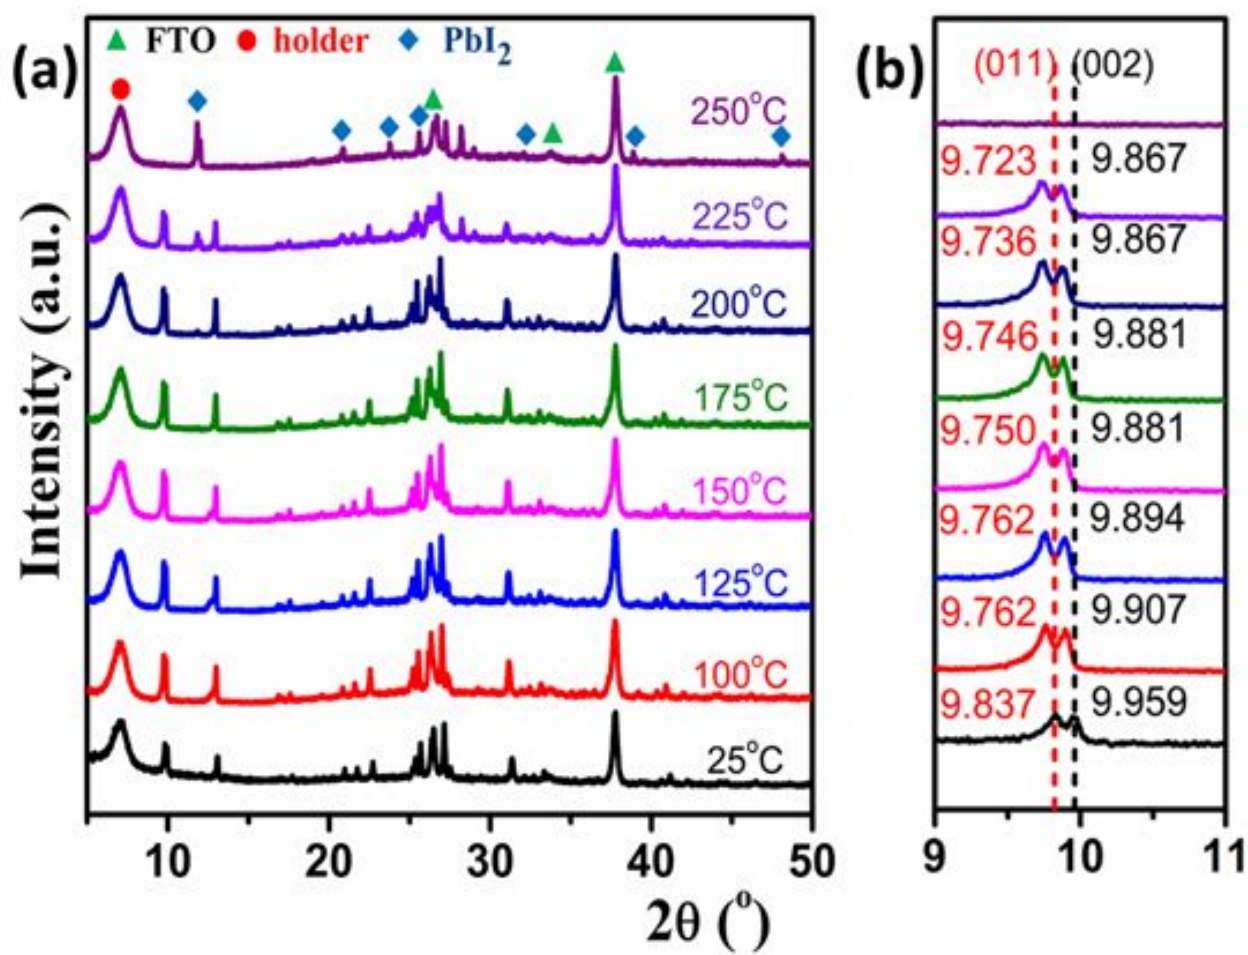

Figure S6 (a) Temperature dependent XRD of CsPbI<sub>3</sub> film measured in vacuum and enlarged view of the diffraction results in the 2-theta range of 9-11 °C.

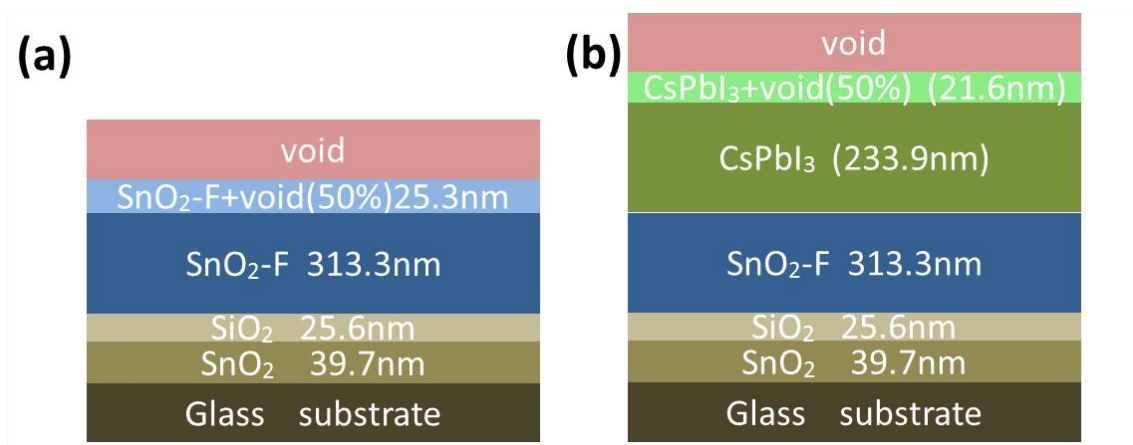

Figure S7 Schematics of the optical model of (a) the FTO substrate and (b) the  $\text{CsPbI}_3$  thin films.

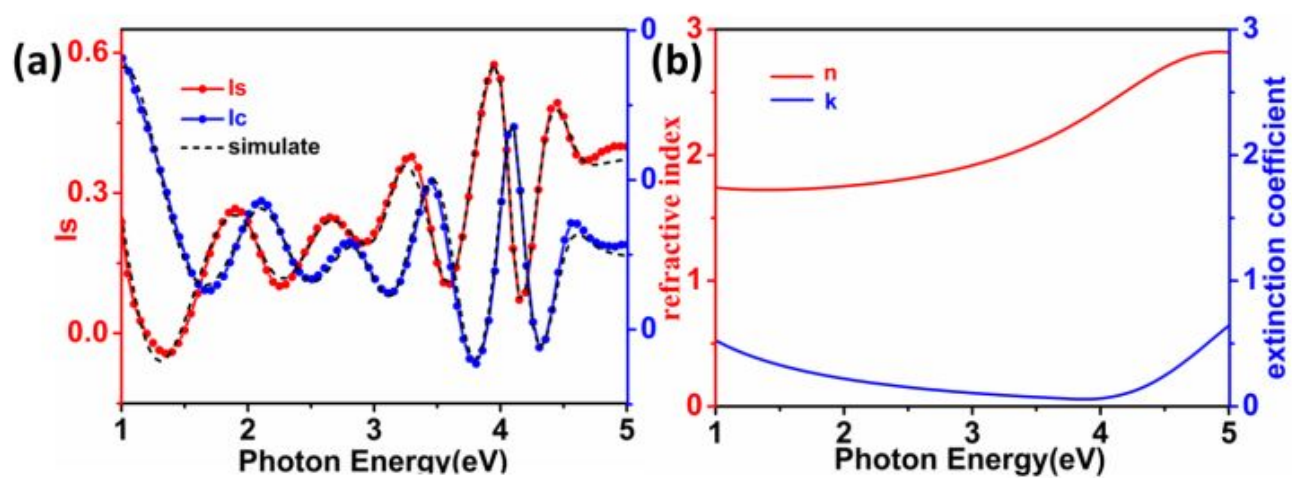

Figure S8 Measurement and analysis for the FTO substrate: (a) Ellipsometric experimental spectra (point lines) and simulate spectra (dotted lines) of the FTO substrate at a 70 ° angle of incidence. (b) Photo energy-dependent optical constants of the FTO layer.

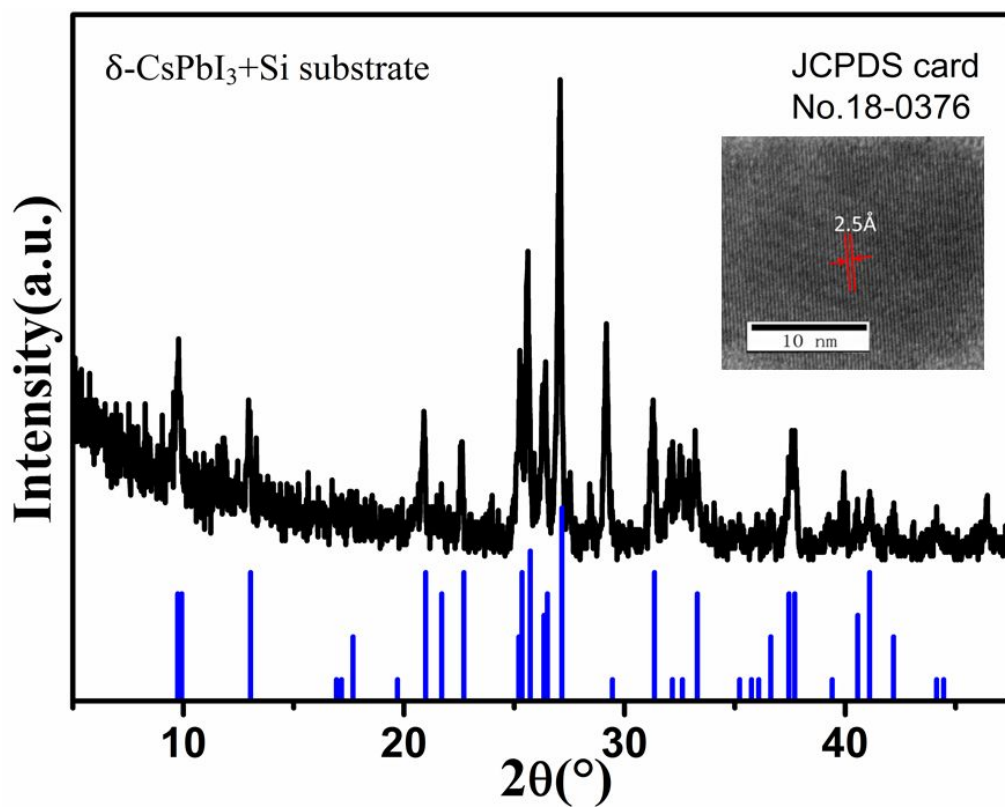

Figure S9 XRD patterns of the  $\delta$ -CsPbI<sub>3</sub> thin film on silicon substrate. Inset shows a HRTEM image of  $\delta$ -CsPbI<sub>3</sub> with a lattice fringe of 2.5 Å.



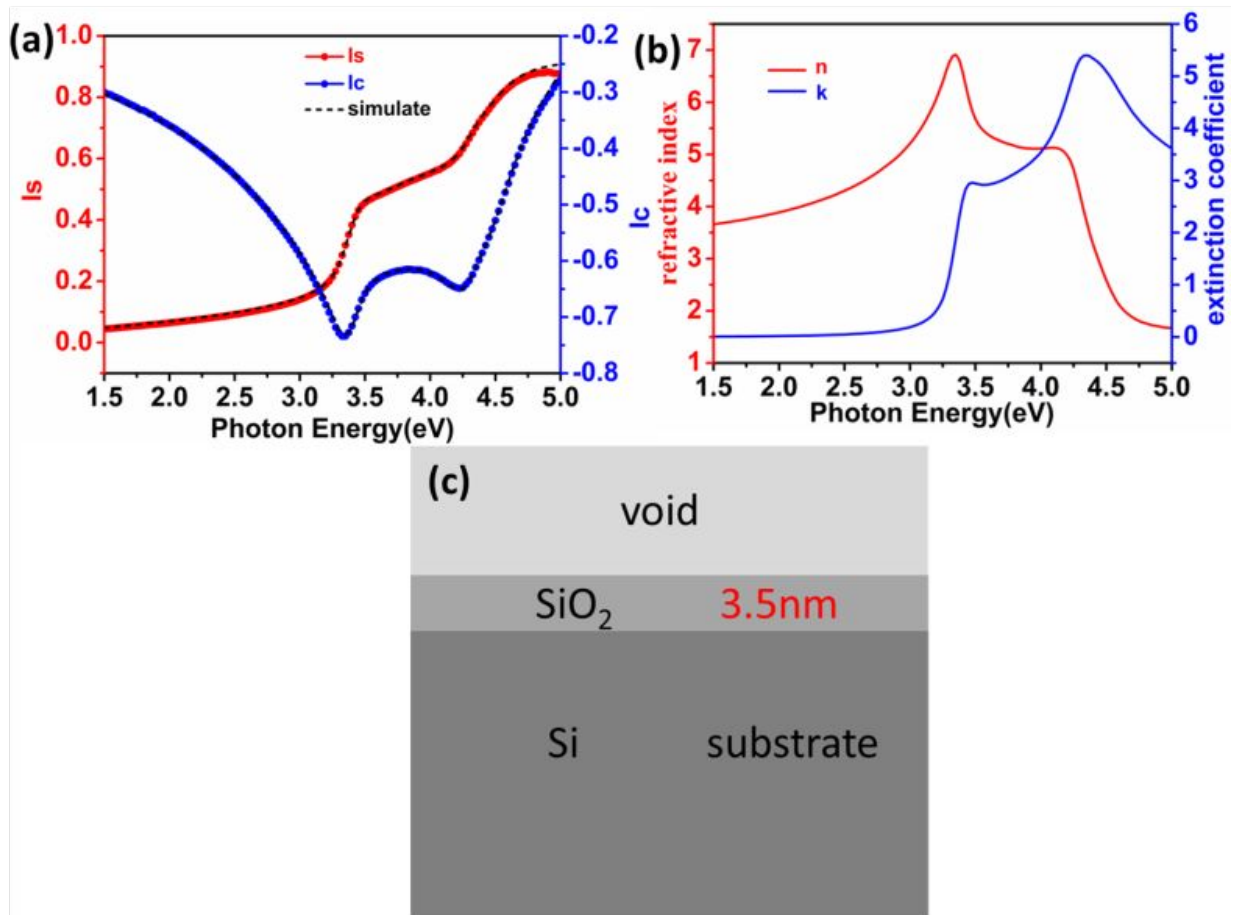

Figure S10 Measurement and analysis for the Si substrate: (a) Ellipsometric experimental spectra (point lines) and simulate spectra (dotted lines) of the Si substrate at a 70 ° angle of incidence. (b) Photon energy-dependent optical constants of the SiO<sub>2</sub> layer. (c) Schematic of the optical model. Results of the fitting parameters are marked in red in the model.



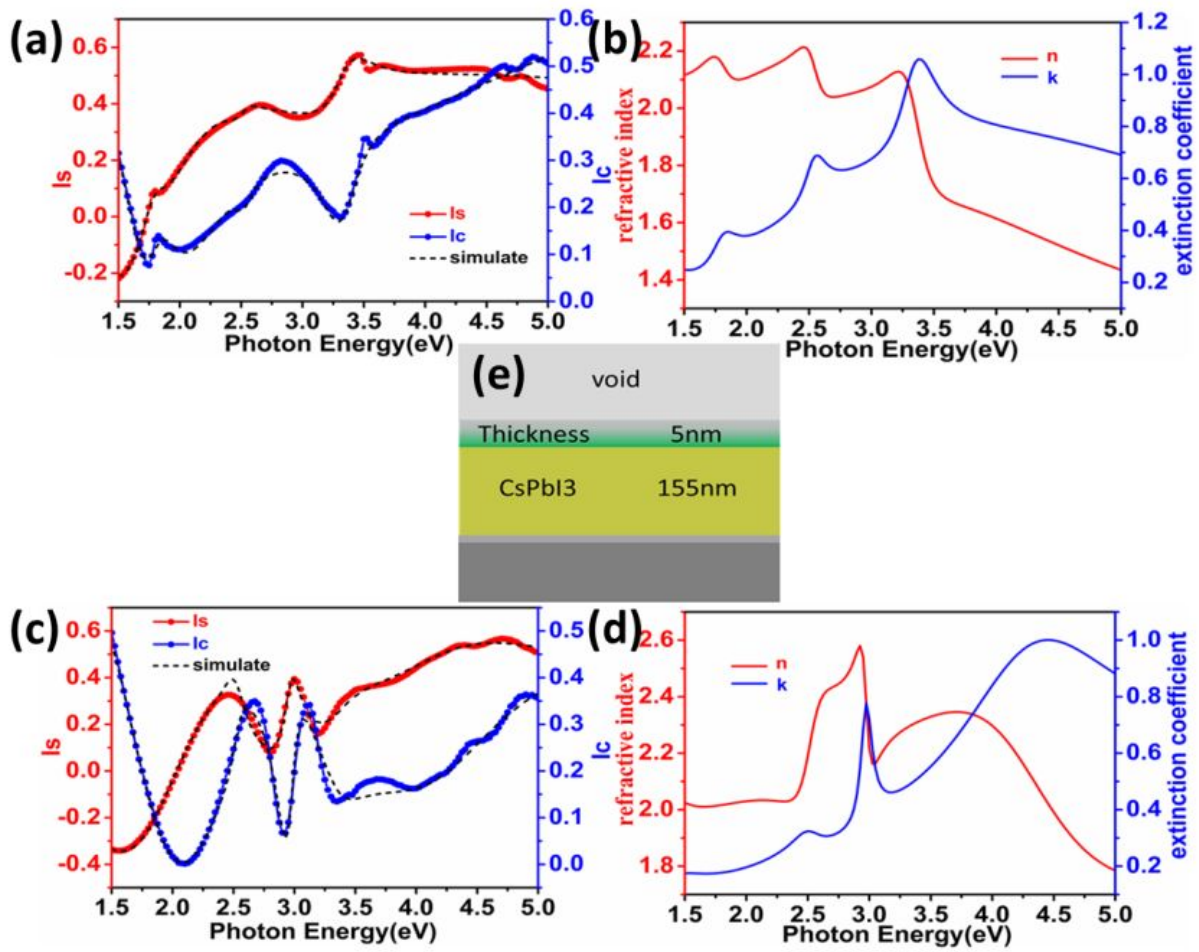

Figure S11 Measurement and analysis for the  $\alpha$ -CsPbI<sub>3</sub> and the  $\delta$ -CsPbI<sub>3</sub> thin film on the Si substrate: (a) and (c) Ellipsometric experimental spectra (point lines) and simulate spectra (dotted lines) of the  $\alpha$ -CsPbI<sub>3</sub> and the  $\delta$ -CsPbI<sub>3</sub> thin film at a 70 ° angle of incidence. (b) and (d) Photo Energy-dependent optical constants of the  $\alpha$ -CsPbI<sub>3</sub> and the  $\delta$ -CsPbI<sub>3</sub> thin film layer. (e) Schematic of the optical model.

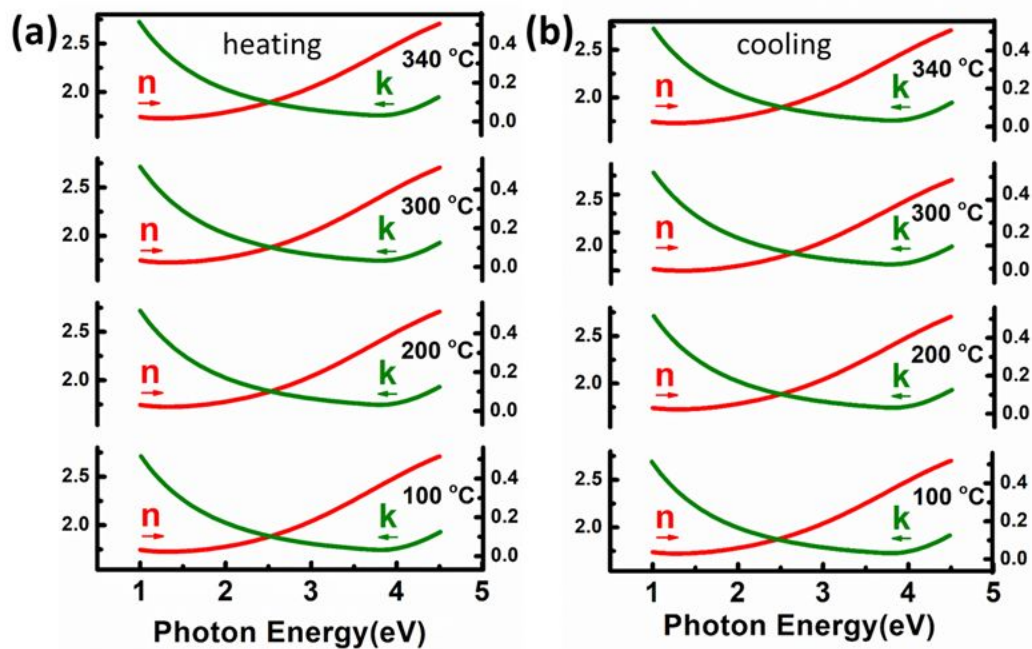

Figure S12 In-situ dynamic ellipsometry spectra of FTO substrate in (a) heating and (b) cooling processes from 100 to 360 °C.

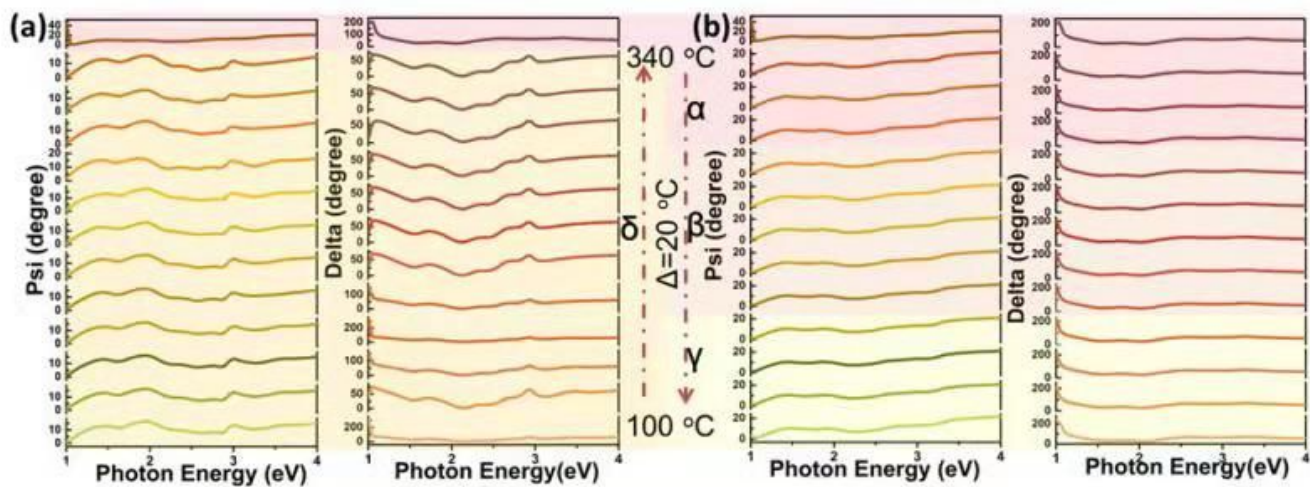

Figure S13 In-situ dynamic ellipsometry spectra of as-prepared CsPbI<sub>3</sub> film in (a) heating and (b) cooling processes from 100 to 360 °C.

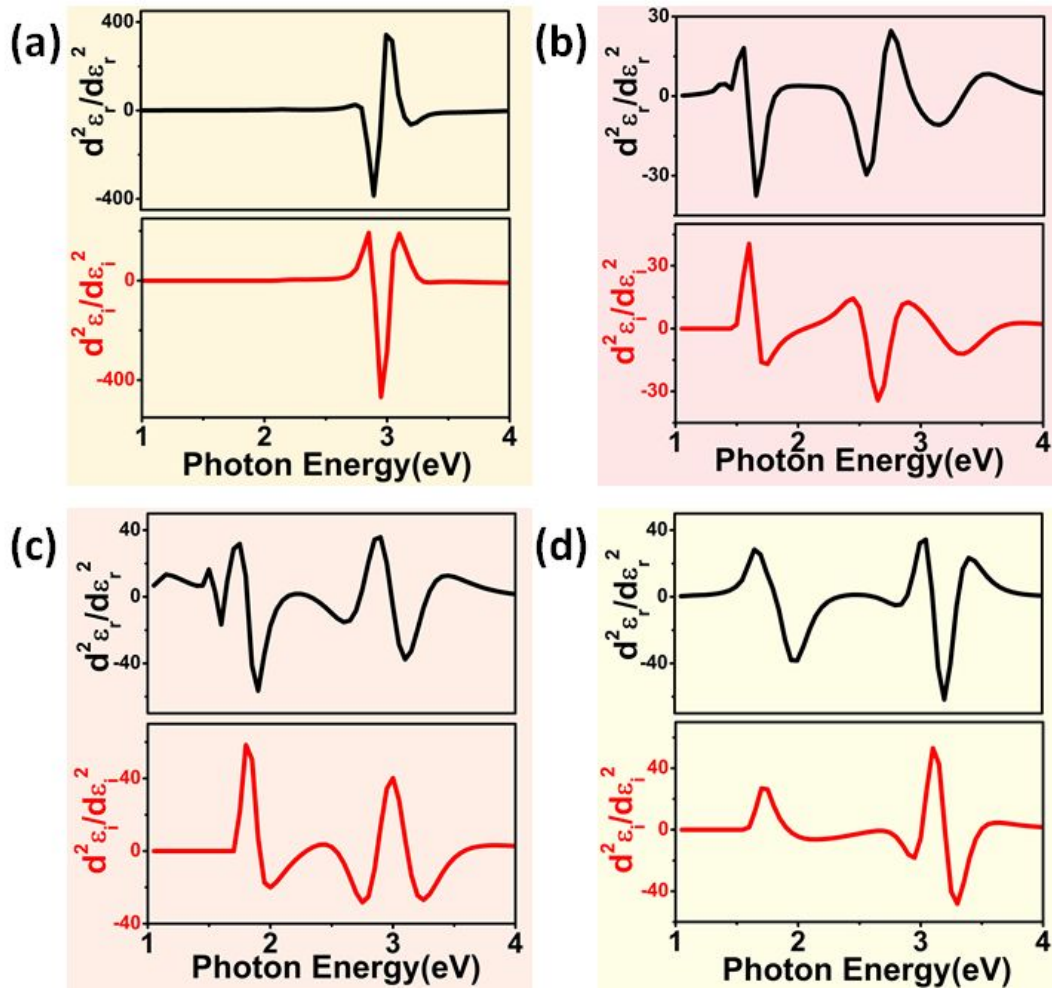

Figure S14 Second derivatives of the pseudodielectric function numerically calculated spectra for four phases of CsPbI<sub>3</sub> thin films: (a)  $\delta$  (b)  $\alpha$ , (c)  $\beta$  and (d)  $\gamma$ , respectively.
